# Molecular Characterization of *Streptococcus agalactiae* Isolated from Bovine Mastitis in Eastern China

Yongchun Yang, Yinglong Liu, Yunlei Ding, Li Yi, Zhe Ma, Hongjie Fan\*, Chengping Lu

College of Veterinary Medicine, Nanjing Agriculture University, Nanjing, China

## Abstract

One hundred and two *Streptococcus agalactiae* (group B streptococcus [GBS]) isolates were collected from dairy cattle with subclinical mastitis in Eastern China during 2011. Clonal groups were established by multilocus sequence typing (MLST) and pulsed-field gel electrophoresis (PFGE), respectively. Capsular polysaccharides (CPS), pilus and alpha-like-protein (Alp) family genes were also characterized by molecular techniques. MLST analysis revealed that these isolates were limited to three clonal groups and were clustered in six different lineages, i.e. ST (sequence type) 103, ST568, ST67, ST301, ST313 and ST570, of which ST568 and ST570 were new genotypes. PFGE analysis revealed this isolates were clustered in 27 PFGE types, of which, types 7, 8, 14, 15, 16, 18, 23 and 25 were the eight major types, comprising close to 70% (71/102) of all the isolates. The most prevalent sequence types were ST103 (58% isolates) and ST568 (31% isolates), comprising capsular genotype Ia isolates without any of the detected Alp genes, suggesting the appearance of novel genomic backgrounds of prevalent strains of bovine *S. agalactiae*. All the strains possessed the pilus island 2b (PI-2b) gene and the prevalent capsular genotypes were types Ia (89% isolates) and II (11% isolates), the conserved pilus type providing suitable data for the development of vaccines against mastitis caused by *S. agalactiae*.

**Citation:** Yang Y, Liu Y, Ding Y, Yi L, Ma Z, et al. (2013) Molecular Characterization of *Streptococcus agalactiae* Isolated from Bovine Mastitis in Eastern China. PLoS ONE 8(7): e67755. doi:10.1371/journal.pone.0067755

**Editor:** Dongsheng Zhou, Beijing Institute of Microbiology and Epidemiology, China

**Received:** February 3, 2013; **Accepted:** May 21, 2013; **Published:** July 10, 2013

**Copyright:** © 2013 Yang et al. This is an open-access article distributed under the terms of the Creative Commons Attribution License, which permits unrestricted use, distribution, and reproduction in any medium, provided the original author and source are credited.

**Funding:** This study was supported by grants from the National Natural Science Foundation of China (31172319, 31272581), the Jiangsu Agricultural Science and Technology Innovation Fund (CX(12)3078), the Priority Academic Program Development of Jiangsu Higher Education Institutions (PAPD), and the Doctoral Program of Higher Education of China (2010097110005). The funders had no role in study design, data collection and analysis, decision to publish, or preparation of the manuscript.

**Competing interests:** The authors have declared that no competing interests exist.

\* E-mail: fhj@njau.edu.cn

## Introduction

*Streptococcus agalactiae*, also referred to as group B streptococcus (GBS), is one of the leading causes of bovine mastitis, which has economically important implications for the dairy cattle industry throughout the world [1]. *S. agalactiae* is also an important human pathogen that can induce invasive infections in neonates, the elderly and pregnant women [2,3,4]. There is indirect evidence that *S. agalactiae* is transmitted between cattle and humans [5]. Clearly, control and prevention of *S. agalactiae* mastitis will improve the quantity and quality of milk production and have important significance for animal welfare and public health. As we know, studies of the molecular epidemiology of field *S. agalactiae* strains is vitally important in implementing efficient management practices in dairy farms. However, no information regarding the molecular characterization of *S. agalactiae* strains occurring in farms in China has previously been documented.

Multilocus sequence typing (MLST) and pulsed-field gel electrophoresis (PFGE) typing are two genotype methods used to characterize and distinguish specific clones among GBS

isolates [6]. MLST is an unambiguous sequence-based and reliable typing tool, allowing comparison of the gene distribution of different isolates collected from all geographic areas and further investigation of the population structure [6,7]. Five hundred and eighty-three *S. agalactiae* sequence types (STs) have been identified and made available on the MLST website as of May 2012 (<http://pubmlst.org/sagalactiae/>), although information about bovine strains is still limited.

Capsular serotyping is a classical method used for *S. agalactiae* in epidemiological studies. To date, ten serotypes, based on the *S. agalactiae* capsular polysaccharides (CPS), have been identified, including Ia, Ib, II-VIII and a new serotype IX [8]. Capsular genotyping is considered more suitable for epidemiological investigation because the serotypes can be identified with or without the CPS expression.

The alpha-like protein (Alp) family play an important role in *S. agalactiae* pathogenesis and are also vaccine candidates [9]. Six members of the Alp family have been extensively studied, including Alpha-C, Rib, Alp1 (Epsilon), Alp2, Alp3 and Alp4 [10], they are encoded by genes *bca*, *alp1* (Epsilon), *alp2/3*, *Rib*, and *alp4*, respectively.

**Table 1.** CCs, STs, capsular genotypes, pilus types, alpha-like protein genes and PFGE types of the 102 bovine *S. agalactiae* strains.

| CCs <sup>a</sup> and ST <sup>b</sup> | Allelic profile <sup>c</sup> |   |   |    |    |    |   | Capsular genotype |               | PI <sup>d</sup> | Alp <sup>e</sup> gene (No. of isolates) | PFGE type (No. of isolates)                                                                                                                                |
|--------------------------------------|------------------------------|---|---|----|----|----|---|-------------------|---------------|-----------------|-----------------------------------------|------------------------------------------------------------------------------------------------------------------------------------------------------------|
|                                      |                              |   |   |    |    |    |   | (No. of isolates) | Frequency (%) |                 |                                         |                                                                                                                                                            |
| CC67                                 |                              |   |   |    |    |    |   |                   | 10            |                 |                                         |                                                                                                                                                            |
| 67                                   | 13                           | 1 | 1 | 13 | 1  | 1  | 5 | Ia (1)            | 1             | 2b              | NT <sup>f</sup> (1)                     | 3(1)                                                                                                                                                       |
|                                      |                              |   |   |    |    |    |   | II (4)            | 4             | 2b              | NT (4)                                  | 3(1), 4(1), 8(1), 13(1)                                                                                                                                    |
| 301                                  | 13                           | 1 | 1 | 13 | 1  | 28 | 5 | II (4)            | 4             | 2b              | alp1 (4)                                | 1 (1), 11 (1), 12 (1), 22 (1)                                                                                                                              |
| 313                                  | 13                           | 1 | 1 | 2  | 1  | 28 | 5 | II (1)            | 1             | 2b              | alp1 (1)                                | 11 (1)                                                                                                                                                     |
| CC64                                 |                              |   |   |    |    |    |   |                   | 2             |                 |                                         |                                                                                                                                                            |
| 570                                  | 16                           | 1 | 1 | 2  | 1  | 1  | 5 | II (2)            | 2             | 2b              | alp4 (2)                                | 9(2)                                                                                                                                                       |
| CC103                                |                              |   |   |    |    |    |   |                   | 88            |                 |                                         |                                                                                                                                                            |
| 103                                  | 16                           | 1 | 6 | 2  | 9  | 9  | 2 | Ia (58)           | 57            | 2b              | NT (58)                                 | 6 (1), 7 (25), 8 (5), 10 (3), 14 (8), 15 (7), 17 (1), 18 (5), 19 (3), 2 (1), 5 (1), 12 (2), 16 (6), 20 (1), 21 (1), 23 (5), 24 (2), 25 (9), 26 (3), 27 (1) |
| 568                                  | 16                           | 1 | 6 | 2  | 51 | 9  | 2 | Ia (32)           | 31            | 2b              | NT (32)                                 | 21 (1), 23 (5), 24 (2), 25 (9), 26 (3), 27 (1)                                                                                                             |

<sup>a</sup> CC, clonal complex. <sup>b</sup> ST, sequence type. <sup>c</sup> The allelic profiles are presented in the following order: *adhP*, *pheS*, *atr*, *glnA*, *sdhA*, *glcK*, and *tkf*. <sup>d</sup> PI, pilus island. Minus in this column indicates the absence of a PI-1 gene. <sup>e</sup> Alp, alpha-like protein. <sup>f</sup> NT, non-typeable.

Three types of pili of *S. agalactiae* have been identified and designated as pilus island 1 (PI-1), PI-2a and PI-2b, of which PI-2a and PI-2b are encoded by genes located in two distinct loci in the same region of the genome, while the PI-1 gene is located in a separate region [11].

The objectives of this study were to elucidate the relationships between bovine *S. agalactiae* strains by molecular characterization based on capsular genotyping, pilus and Alp gene profiling and MLST and PFGE analyses.

**Results**

**Identification of *S. agalactiae* in dairy cows**

Milk samples were collected from a total of 619 cows with subclinical mastitis from 33 dairy farms located in six provinces (Jiangsu, Anhui, Shandong, Zhejiang, Jiangxi and Fujian) and one municipality (Shanghai). *S. agalactiae* was detected in milk samples from 102 cows from 21 farms located at five provinces (except Fujian province) and one municipality. In total, 102 bovine isolates (one isolate per cow) of *S. agalactiae* were selected and analyzed (a complete list of all isolates is provided in Table S1).

**Capsular genotype and alpha-like protein**

All 102 bovine *S. agalactiae* isolates belonged to capsular genotype Ia and II (Table 1) according to the multiplex PCR assay. Overall, type Ia was the most prevalent accounting for approximately 89% (91/102) of isolates. Type II was represented by 11% (11/102) of isolates. A large proportion (93%; n = 95/102) of the bovine *S. agalactiae* isolates was non-typeable (NT) to any of the detected Alp genes according to the multiple PCR assay (Table 1). Only 5% (5/102) of Alp1 gene-positive strains and 2% (2/102) Alp4 gene-positive strains were characterized. The alpha-like protein genes associated with the capsular genotype were also identified (Table 1): *alp1* and *alp4* associated with genotype II, NT associated with genotype II and Ia ( $\chi^2=36.595$ ,  $P < 0.001$ ).

**Pilus type**

Each strain was detected in the three PCR assays for pilus typing. PI-1 and PI-2a genes were absent in all of the investigated bovine strains although the corresponding genes were detected in the positive controls. All 102 bovine *S. agalactiae* strains carried the PI-2b gene alone (Table 1).

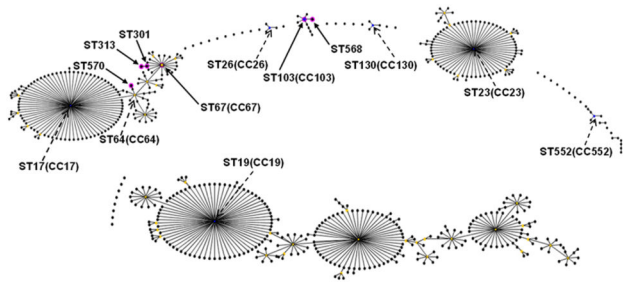

**Figure 1. eBURST diagram of the *Streptococcus agalactiae* population.** Each sequence type (ST) is represented as a dot. The dots positioned centrally in the cluster are primary founders (blue) or subgroup founders (yellow). Pink circles indicate STs detected from the strains in this study and are marked by solid line arrows. The 102 bovine isolates were clustered within sequence types ST103, ST568, ST67, ST301, ST313 and ST570 and grouped within three clonal complexes (CCs): CC103, CC67 and CC64. Both ST67 and ST64 were subgroups of CC17. ST568 was a single-locus variant (SLV) for ST103. ST301 and ST313 were SLVs and DLVs (two-locus variants), respectively of ST67. ST570 was a DLV of both ST64 and ST67, derived from ST64. The predicted founders that were not obtained in this study are marked by dashed arrows. For clarity, ST labels have been removed.

doi: 10.1371/journal.pone.0067755.g001

**MLST sequence types and PFGE analysis**

All 102 isolates were characterized using MLST; one novel allele (*sdhA* allele 51, GenBank accession number is KF006268) and two new STs (ST 568 and ST570) were identified. ST568 is a single-locus variant (SLV, in which one allele differs from the ST) of ST103, ST570 is a double-locus variant (DLV, in which two alleles differ from the ST) of ST64 and ST67 according to eBURST analysis. ST568 was assigned based on the presence of a novel allele (*sdhA* allele 51) and ST570 was assigned based on new combinations of allele profiles. In general, all 102 bovine isolates were clustered in six STs: ST103, ST568, ST67, ST301, ST313 and ST570, and were grouped in three clonal complexes (CC): CC67, CC64 and CC103 by eBURST analysis (Figure 1). Figure 1 also shows the close correlation between CC67 and CC64, which are both subgroups of CC17. This was further supported by the relationship between ST570 and ST67 (ST570 was a DLV of ST67) as described previously. However, CC103 remained as a distinct group.

The isolates were grouped in 27 PFGE types in this study, of which 16 common (represented by dashed rectangles) and 11 unique types were identified, with a similarity between 43.9% and 100% (Figure 2). Eight major PFGE types (7, 8, 14, 15, 16, 18, 23 and 25 shown in Figure 2) comprised close to 70% (71/102) of all the isolates. A total of eight more minor types, comprising only two or three isolates, corresponded to almost 20% (20/102) of all the isolates.

Table 1 shows the 11 capsular genotype II isolates that were distributed among four STs (ST67, ST301, ST313, ST570) and eight PFGE types. The 91 type Ia isolates belonged to three

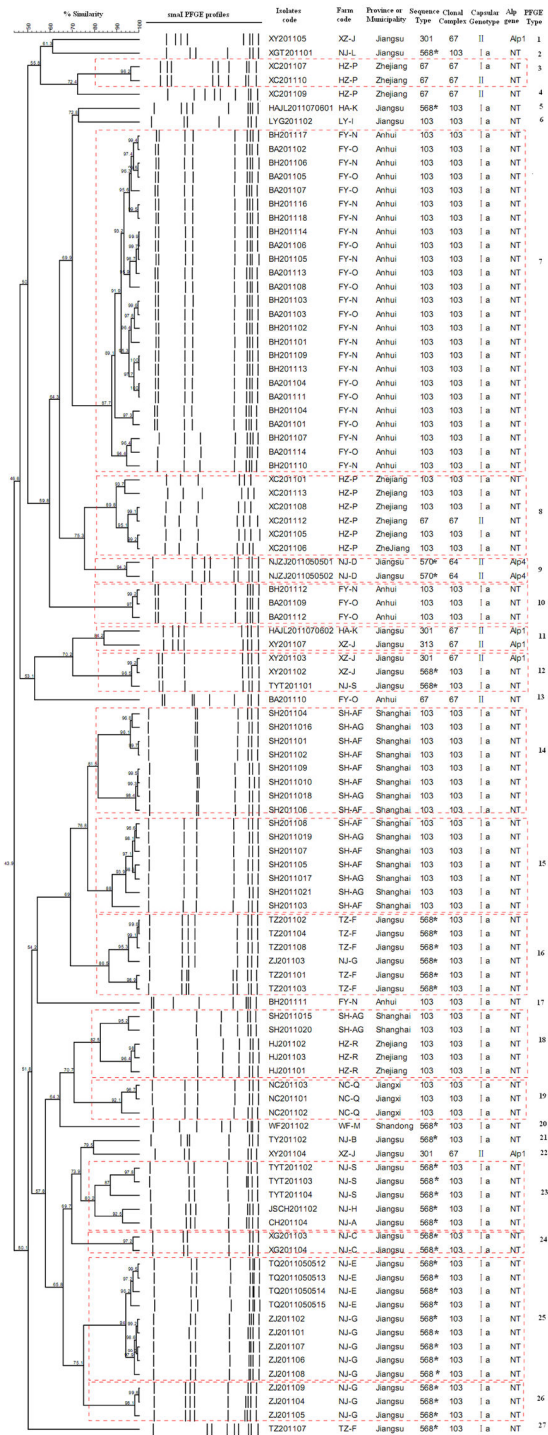

**Figure 2. Dendrogram of PFGE profiles of 102 bovine *Streptococcus agalactiae*.** The Dendrogram was constructed based on BioNumerics analysis of the *S. agalactiae* PFGE patterns and cluster analysis using the Dice coefficient and UPGMA of the digitalized PFGE patterns for the *S. agalactiae* strains. Clustering settings of 0.00% optimization and 1.5% band position tolerance were used. 568 \* and 570\* were identified as novel sequence types in this study.

doi: 10.1371/journal.pone.0067755.g002

STs (ST67, ST103, ST568) and 21 different PFGE types. ST103 and novel sequence type ST568, both belonging to CC 103 (Figure 1), were the predominant sequence types. These types comprised genotype Ia isolates associated with NT *Alp* genes and represented 57% (58/102) and 31% (32/102) of the isolates, respectively (Table 1). These isolates were clustered into 20 types according to the PFGE analysis. ST67, ST313 (DLV of ST67) and ST301 (SLV of ST67), were grouped in CC67 (Figure 1). ST67 represented 5% (5/102) of the isolates assigned to capsular genotype II (4 isolates) and Ia (1 isolate) associated with NT *Alp* genes, and were further clustered in four PFGE types. ST313 and ST301 comprised a total of 5% (5/102) of the isolates, which were assigned to capsular genotype II carrying *Alp1* genes and belonged to five PFGE types. ST570, belonging to CC64, represented only two isolates of serotype II carrying the *Alp4* gene and clustered in PFGE type 9 (Table 1).

The isolates clustered in the same ST were clearly divided into several distinct PFGE types. For example, ST103 and 568, were divided into nine and eleven different PFGE types, respectively (Table 1 Figure 2). It was also observed that the isolates belonging to different capsular genotypes were clustered in the same ST or PFGE type, while the same capsular genotypes were divided into different ST or PFGE types (Table 1 Figure 2).

**Distribution of *S. agalactiae* between and within farms**

The STs, molecular genotypes, *Alp* genes of *S. agalactiae* among the 21 *S. agalactiae* positive farms are presented in Figure 3. Seven different genotypes were found when combining these three types. The predominant type, ST568, a novel ST which is a SLV of ST103, combined with Ia and NT and was found exclusively among isolates from farms located in northern provinces (Jiangsu and Shandong) only. ST103, the predicted founder of ST568, combined with Ia and NT, and with few exceptions, was found exclusively among isolates in the farms located in the southern provinces (including Shanghai, Anhui and Zhejiang).

On the basis of the combination of genotypes described, the isolates were characterized into 31 types when combined with the PFGE genotypes (Figure 3). Comparison of *S. agalactiae* isolates between herds revealed similar genotypes (10 types) distributed in different herds, and herd specific types (21 types) were also observed (Figure 3). Comparison of *S. agalactiae* isolates from the same herd showed *S. agalactiae* isolates displaying either different types (in 12 herds) or the same type (in 9 herds) within a same herd. Clustering of multiple isolates of the same type within an individual herd was also observed on several farms.

**Discussion**

In the present study, 21 of 33 dairy farms screened positive for *S. agalactiae*, although control measures were managed in these farms. It was reported that the herd level prevalence of *S. agalactiae* increased steadily from 2000 to 2008 in Denmark, even with systematic control measures in place, which had previously been effective in preventing *S. agalactiae*

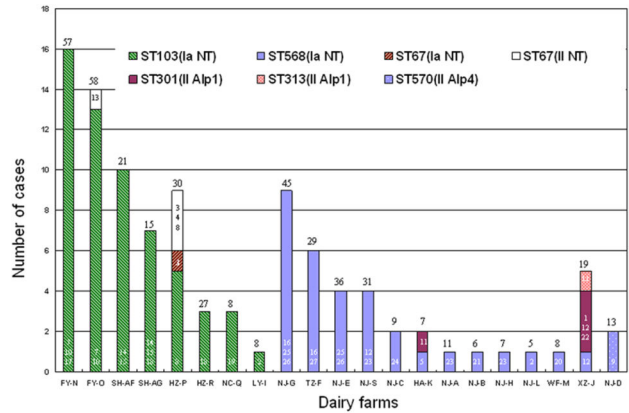

**Figure 3. Typing of 102 *Streptococcus agalactiae* isolates present in 21 commercial dairy farms in Eastern China.** The percentage of *Streptococcus agalactiae* positive cases is shown above each bar. ST indicates the MLST sequence type; the corresponding capsular genotype/alpha-like protein type is shown in parentheses. NT, non-typeable. The PFGE types are represented by the Arabic numerals in each bar.

doi: 10.1371/journal.pone.0067755.g003

mastitis [12]. The increasing prevalence may be due to an increase infection rate that exceeds the capacity for eradication. This demonstrates that *S. agalactiae* remains a significant cause of mastitis in cattle herds, and more effective management is required to control *S. agalactiae* mastitis.

The CPS of *S. agalactiae* are one of the most important virulence factors and form the main components of multivalent vaccines [13]. Capsular genotyping by multiplex PCR revealed that Ia was the most predominant capsular genotype in Eastern China. Similar findings have been reported in Germany where serotype Ia was shown to be prevalent in 19 of 79 bovine *S. agalactiae* isolates [14]. However, serotype III and serotypes V and IV were found to be the most prevalent in Quebec (Canada) and Norway, respectively [15,16]. The diversity in serotype distribution of mastitis *S. agalactiae* might be the result of divergent geographical regions, times, management practices and breeds of cow. In the present study, all the bovine *S. agalactiae* isolates from 21 farms of five provinces and one municipality in Eastern China belonged to serotype Ia and II.

The major surface-localized protein antigens of *S. agalactiae* belong to the alpha-like protein (Alp) family of surface proteins. It is reported that *S. agalactiae* strains usually carry at least one of the alpha-like proteins, of which proteins Epsilon (Alp1), Alp2, Alp3, Alp4, Alpha-C and Rib have been extensively studied [17], although several bovine and human strains have been reported to be negative for any of the six proteins [16,17,18]. In this study, the multiple PCR assay for detecting Alp genes showed that 92% of the tested bovine isolates were non-typeable, possibly due to mismatch of the primers for the genes encoding alpha-like proteins in these isolates. Many studies have previously shown the associations of Alp genes and serotypes; for example, the Alpha-C protein gene with

serotypes Ia and II [17,19], the Epsilon/alp1 gene with serotype Ia [19] and the Rib gene with serotype II [10]. However, in this study, different combinations of Alp genes and capsular genotypes were found; the Epsilon/alp1 and alp4 genes were significantly associated with type II, and NT Alp genes with type Ia and II. The novel combinations of Alp genes and serotypes are suggested by the emergence of new *S. agalactiae* clones [6].

*S. agalactiae* strains carry at least one of the three pilus islands. Margarit et al. [20] demonstrated that all 289 human strains they investigated carried either PI-2a (73% strains) or PI-2b (27% strains), while PI-1 was missing in 28% of the strains. Following analysis of 238 isolates, Sørensen and colleagues [21] found that all the isolates carried PI-2, but PI-1 was missing in 54% of the bovine isolates and in 24% of the human isolates; therefore, it was concluded that PI-1 genes do not exist in several lineages. In this study, all of the 102 bovine *S. agalactiae* strains from Eastern China carried only PI-2b, while PI-1 was absent from all of the strains. Since previous studies have shown that pilus-based vaccines can be effective in preventing infections caused by homologous challenge of *S. agalactiae* [20], PI-2b proteins may be considered as potential vaccine candidates for formulation of subunit vaccines against bovine *S. agalactiae* mastitis.

Two novel sequence types, ST568 and ST570, were found in this study, which was expected because the information in the MLST database about the *S. agalactiae* isolates prevailing in China is severely lacking. Thus, the submission of our data to this database enriches the available data on bovine *S. agalactiae* isolates. The novel sequence type ST568 and its predicted founder ST103 were the predominant STs found in this study. ST103 is occasionally obtained from dairy cows according to previous reports [22]. However, a recent study shows ST103 to be a predominant ST in bovine strains from Denmark [23] and here it is shown to be prevalent in Eastern China, which contributes to a better understanding of the global epidemiology of mastitis *S. agalactiae* isolates. The new sequence type ST570, which is a SLV of ST 64, represented only 2% of the isolates in this study. Conversely, its predicted founder ST64 has been reported as a common ST among bovine *S. agalactiae* strains [21]. ST67, ST301 and ST313 were grouped in CC67, representing only a total of 12% of the isolates in this study. However, ST67 has previously been considered to be the most common ST among bovine isolates [2]. The occurrence of unique and identical STs identified between Eastern China and other countries shows that the types of ST and predominant STs differ in bovine isolates from divergent geographical regions. However, limited clonal groups appear in different region and countries according to MLST analysis. In present study, CC67 and CC64 showed a high degree clonal of relatedness, while CC103 remained as a distinct group, suggesting the *S. agalactiae* strains from bovine milk in Eastern China comprise two genetically distinct populations.

In this study, identical capsular genotypes belonged to different clonal groups and identical STs, PFGE types shared by various capsular genotypes were observed. This switching may be the result of horizontal transfer of capsular genes,

which is likely to be driven by the host immune response and supported by the increased fitness acquired by isolates showing specific phenotype-genotype combinations [6,24].

Similar sequence types prevalent on several different farms were observed in this study. The novel ST568 is prevalent in the north, while ST103, the predicted founder of ST568, is predominant in the south of this region, thus indicating that the prevailing *S. agalactiae* on these related farms are from the same strain, and might be transmitted from farms in the south to those in the north. It can be speculated that this occurs as a result of the commercial movement of infected animals between farms. Further analysis using PFGE demonstrated that the isolates grouped in the same ST were divided into several different PFGE types. The combination of genotypes presented several phenomena: farm specific in several farms, homology of the isolates among several farms, heterogeneity in isolates within several individual herds and multiple cows infected by a single strain on the same farms. *S. agalactiae* is a well-known contagious mastitis pathogen, with transmission occurring between cows within herds [1]. This mode of transmission is thought to explain how a single strain prevails in the same herd in the present study and in previous reports [25]. Different PFGE types were found in isolates clustered in the same STs, which may be accounted for by different management practices between farms. Homology of isolates in different farms and heterogeneity in isolates within individual herds are reported for the first time in this study. As previously speculated, the homology of isolates in different farms might also be due to commercial movement of infected animals between farms; however, it is not known why and how several different genotypes of *S. agalactiae* strains were obtained from the same herd, because few molecular epidemiological studies of sources of infection or transmission routes have been conducted in cattle. This heterogeneity might suggest the emergence of several strains originating from several sources of infection, with infected humans as the suspected infection source [26].

In conclusion, the results of the present study demonstrate that the distribution of STs, capsular genotypes, and pili genes among the dairy cattle in Eastern China were similar to previously reports of bovine *S. agalactiae* strains; however some geographic characteristics were revealed by the emergence of unique Alp profiles and prevalent novel STs. ST103 to be a predominant ST in bovine mastitis from Eastern China, which contributes to a better understanding of the global epidemiology of mastitis *S. agalactiae* isolates. The conserved pilus type of *S. agalactiae* isolates provides positive information for the development of vaccines against *S. agalactiae*. Further investigation is necessary to establish the epidemiology of *S. agalactiae*, and to determine how *S. agalactiae* can be best controlled and prevented.

## Materials and Methods

### Ethics

Milk samples were obtained with consent from animals with subclinical mastitis under the ethical approval granted by College of Veterinary Medicine, the Nanjing Agricultural

University Veterinary College. The protocol was permitted by the owners of the dairy farms under investigation. All efforts were made to minimize animal suffering.

### S. *agalactiae* reference strains

Four reference strains of *S. agalactiae*: ATCC 13813 (serotype II), ATCC 12403 (Serotype III), ATCC BAA-611 (Serotype V) and A909 (Serotype Ia), used in this study were obtained from the American Type Culture Collection (ATCC) as controls.

### Identification of *S. agalactiae* from milk samples

A total of 619 cows from 33 large-scale dairy farms located in Eastern China were selected to participate in this study according to the willing of the farmers (information about the farms were provided in Table S2). Holsteins dairy cows were preferably kept on the 33 dairy farms with a mean yield at 305 d of 7,539 kg of milk. For each farm, milk somatic cell counts (SCC) of each cow were routinely carried out twice per month by electronic counting (Fossomatic 5000™, Foss Electric, Hillerød, Denmark). Subclinical mastitis is suspected when SCC  $\geq$ 300,000 cells/ml, with decreased milk production and no inflammation of the udder. Milk samples were aseptically collected from dairy cattle with subclinical mastitis in these farms from January to December in 2011. In brief, each udder of the subclinical mastitis cow was washed and dried with a clean face towel. Each teat was disinfected with swabs soaked in 70% ethyl alcohol. The first few streams were discarded before milk samples were collected in 10-ml sterile plastic tubes and numbered. Each teat was disinfected with 70% ethyl alcohol after collection. The samples were taken to the laboratory as soon as possible, or stored at -20°C for later analysis.

For isolation of *S. agalactiae*, 20  $\mu$ l of milk was streaked on 5% sheep blood agar plates and incubated at 37°C for 24 h. *S. agalactiae* were identified by conventional methods [27] and were further confirmed by PCR with 16S DNA species-specific primers as described by Martinez et al. [28]. A single isolate from each sampled cow was selected and stored at -70°C for further experimental use.

### Bacterial culture and DNA extraction

The isolates, including the reference strains, were cultured in 3 ml of Tryptic soya broth (TSB, MO BIO, Laboratories. Inc.) overnight at 37°C. The bacterial culture was centrifuged (14,000  $\times g$  for 5 min at room temperature) and the pellets were harvested and resuspended in 200  $\mu$ l TE buffer (10 mM Tris-HCl, pH 8.0; 1 mM EDTA, pH 8.0) supplemented with 20 mg/ml (final concentration) of lysozyme and incubated at 37°C for 30 min. Genomic DNA was extracted using the Bacterial DNA extraction kit following manufacturer's specifications for Gram-positive bacteria (Omega Bio-Tek, USA). The extracted DNA was used as the template for PCR.

### Capsular genotyping

The capsular genotype Ia, Ib, II–IX of *S. agalactiae* was identified by a multiplex PCR assay as previously described

[29]. The PCR system (total volume, 25  $\mu$ l) contained 50 ng DNA template, 1 $\times$  PCR buffer; 2 mmol/l MgCl<sub>2</sub>, 200  $\mu$ mol/l dNTPs (dATP, dTTP, dCTP, and dGTP), 400 nmol/l primers cpsI-Ia-6-7-F and cpsI-7-9-F, 250 nmol/l of each other primer and 0.3 U of HotMaster Taq DNA Polymerase (Tiangen, China). The PCR amplification conditions were as follows: preheating at 95°C for 5 min, followed by 15 cycles of 95°C for 1 min, 54°C for 1 min, and 72°C for 2 min and then by an additional 25 cycles of 95°C for 1 min, 56°C for 1 min, and 72°C for 2 min with a final cycle of 72°C for 10 min. Serotypes of strains were identified by analyzing the unique banding pattern following agarose gel (1.5% wt./vol.) electrophoresis.

### Alpha-like protein (Alp) family

The alpha-like protein genes *bca*, *alp1* (*Epsilon*), *alp2/3*, *Rib*, and *alp4* in the strains were detected by a simple multiplex PCR assay described by Creti, et al. [17]. In brief, the PCR system (total volume, 25  $\mu$ l) contained the following: 50 ng DNA template, 1 $\times$  PCR buffer; 2 mmol/l MgCl<sub>2</sub>, 200  $\mu$ mol/l dNTPs, 400 nmol/l of each of the five pairs of primers; 0.3 U of HotMaster Taq DNA Polymerase (Tiangen, China). The amplification conditions were as follows: preheating at 96°C for 3 min, followed by 30 cycles of 95°C for 1 min, 58°C for 45 s, and 72°C for 45 s, with a final cycle of 72°C for 10 min. Amplification of the alpha-like protein genes was evaluated by agarose gel (2% wt./vol.) electrophoresis of the PCR products. Strains that tested negative for any of the Alp genes under investigation were considered non-typeable (NT).

### Pilus typing

To identify the presence of pilus islands in the strains, three PCR assays were used to detect the PI-1, PI-2a or PI-2b genes as described previously [20]. In brief, the PCR system (total volume, 25  $\mu$ l) contained 10 ng DNA template, 1 $\times$  PCR buffer; 2 mmol/l MgCl<sub>2</sub>, 200  $\mu$ mol/l dNTPs, 400 nmol/l of each of the six primers; and 0.25 U of TaqDNA polymerase (Tiangen, China). The amplification conditions were as follows: preheating at 94°C for 5 min, followed by 35 cycles of 94°C for 45 s, 54°C for 45 s, and 72°C for 1 min and 30 s to 2 min (according to the lengths of the amplicons) and concluding with a cycle of 72°C for 10 min. The identity of the PCR products was analyzed by agarose gel (1% wt./vol.) electrophoresis and deemed to be positive based on the expected size of the PCR fragment.

### MLST

All the isolates were typed using multilocus sequence typing (MLST) in this study. The seven housekeeping genes (*adh*, *pheS*, *atr*, *glnA*, *sdhA*, *glcK* and *tkt*) were amplified by PCR and internal fragments sequences were obtained as described previously [7]. For each isolate, the allele number and sequence types (STs) were defined by analysis of the alleles sequence in the MLST database (<http://pubmlst.org/sagalactiae/>). The allele sequences or previously undescribed ST were assigned new numbers and the data were deposited in the MLST database. CC analysis was performed using the entire *S. agalactiae* MLST database and eBURST program (<http://eburst.mlst.net>) [30].

## PFGE

DNA was extracted and digested with the *Sma*I restriction enzyme (Takara, China.) as previously described [31,32]. The PFGE program was performed according to Chen et al. [32]. A *Salmonella* serotype Braenderup H9812 DNA digested with *Xba*I was used as the molecular size standard as recommended in PulseNet [33]. The *S. agalactiae* PFGE patterns were analyzed with BioNumerics (Applied Maths BVBA, Belgium) using an optimization setting of 0.00% and band position tolerance of 1.5%. Cluster analysis was performed using the Dice coefficient and UPGMA of the digitalized PFGE patterns for the 102 *S. agalactiae* strains. Genotypic related groups, characterized at 80% similarity or above are represented by dashed rectangles in the dendrogram.

## Statistical analysis

Categorical data were analyzed by using the Pearson chi-squared test. When data were insufficient for the test demands, Fisher's exact test and Likelihood-ratio tests were used. P values of <0.05 were considered to indicate statistical significance.

## References

- Keefe GP (1997) *Streptococcus agalactiae* mastitis: a review. *Can Vet J* 38: 429-437. PubMed: 9220132.
- Bisharat N, Crook DW, Leigh J, Harding RM, Ward PN et al. (2004) Hyperinvasive neonatal group B *Streptococcus* has arisen from a bovine ancestor. *J Clin Microbiol* 42: 2161-2167. doi:10.1128/JCM.42.5.2161-2167.2004. PubMed: 15131184.
- Edwards MS, Rench MA, Palazzi DL, Baker CJ (2005) Group B streptococcal colonization and serotype-specific immunity in healthy elderly persons. *Clin Infect Dis* 40: 352-357. doi:10.1086/426820. PubMed: 15668856.
- Savoia D, Gottimer C, Crocilla' C, Zucca M (2008) *Streptococcus agalactiae* in pregnant women: Phenotypic and genotypic characters. *J Infect* 56: 120-125. doi:10.1016/j.jinf.2007.11.007. PubMed: 18166228.
- Manning SD, Springman AC, Million AD, Milton NR, McNamara SE et al. (2010) Association of group B *Streptococcus* colonization and bovine exposure: a prospective cross-sectional cohort study. *PLOS ONE* 5: e8795. doi:10.1371/journal.pone.0008795. PubMed: 20098699.
- Gherardi G, Imperi M, Baldassarri L, Pataracchia M, Alfarone G et al. (2007) Molecular epidemiology and distribution of serotypes, surface proteins, and antibiotic resistance among group B streptococci in Italy. *J Clin Microbiol* 45: 2909-2916. doi:10.1128/JCM.00999-07. PubMed: 17634303.
- Jones N, Bohnsack JF, Takahashi S, Ka Oliver, Chan MS et al (2003) Multilocus sequence typing system for group B *Streptococcus*. *J Clin Microbiol* 41: 2530-2536. doi:10.1128/JCM.41.6.2530-2536.2003. PubMed: 12791877
- Slotved HC, Kong F, Lambertsen L, Sauer S, Gilbert GL (2007) Serotype IX, a proposed new *Streptococcus agalactiae* serotype. *J Clin Microbiol* 45: 2929-2936. doi:10.1128/JCM.00117-07. PubMed: 17634306.
- Gilbert GL (2004) Vaccines for other neonatal infections: are group B streptococcal infections vaccine-preventable? *Expert Rev Vaccines* 3: 371-374. doi:10.1586/14760584.3.4.371. PubMed: 15270637.
- Lindahl G, Ståhlhammar-Carlémalm M, Areschoug T (2005) Surface proteins of *Streptococcus agalactiae* and related proteins in other bacterial pathogens. *Clin Microbiol Rev* 18: 102-127. doi:10.1128/CMR.18.1.102-127.2005. PubMed: 15653821.
- Rosini R, Rinaudo CD, Soriani M, Lauer P, Mora M et al. (2006) Identification of novel genomic islands coding for antigenic pilus-like structures in *Streptococcus agalactiae*. *Mol Microbiol* 61: 126-141. doi: 10.1111/j.1365-2958.2006.05225.x. PubMed: 16824100.
- Katholm J, Rattenborg E (2009) Surveillance of the B *Streptococcal* infection in Danish dairy herds. *Dansk Veterinærtidsskrift* 92: 24-31

## Supporting Information

**Table S1.** Characteristics of *Streptococcus agalactiae* isolates from bovine subclinical mastitis in Eastern China. (DOC)

**Table S2.** Information of the 33 commercial dairy farms investigated in this study. (DOC)

## Acknowledgements

We wish to thank Huimin Qian (Jiangsu Provincial Center for Disease Prevention and Control, China) for the helping in PFGE analysis with BioNumerics software.

## Author Contributions

Conceived and designed the experiments: YY HF CL. Performed the experiments: YY YL YD. Analyzed the data: YY ZM HF. Contributed reagents/materials/analysis tools: YY LY. Wrote the manuscript: YY HF.

- Johri AK, Paoletti LC, Glaser P, Dua M, Sharma PK et al. (2006) Group B *Streptococcus*: global incidence and vaccine development. *Nat Rev Microbiol* 4: 932-942. doi:10.1038/nrmicro1552. PubMed: 17088932.
- Merl K, Abdulmawjood A, Lämmler C, Zschöck M (2003) Determination of epidemiological relationships of *Streptococcus agalactiae* isolated from bovine mastitis. *FEMS Microbiol Lett* 226: 87-92. doi:10.1016/S0378-1097(03)00564-0. PubMed: 13129612.
- Zhao Z, Kong F, Martinez G, Zeng X, Gottschalk M et al. (2006) Molecular serotype identification of *Streptococcus agalactiae* of bovine origin by multiplex PCR-based reverse line blot (mPCR/RLB) hybridization assay. *FEMS Microbiol Lett* 263: 236-239. doi:10.1111/j.1574-6968.2006.00428.x. PubMed: 16978362.
- Radtke A, Bruheim T, Afset JE, Bergh K (2012) Multiple-locus variant-repeat assay (MLVA) is a useful tool for molecular epidemiologic analysis of *Streptococcus agalactiae* strains causing bovine mastitis. *Vet Microbiol* 157: 398-404. doi:10.1016/j.vetmic.2011.12.034. PubMed: 22266162.
- Creti R, Fabretti F, Orefici G, von Hunolstein C (2004) Multiplex PCR assay for direct identification of group B *Streptococcal* alpha-protein-like protein genes. *J Clin Microbiol* 42: 1326-1329. doi:10.1128/JCM.42.3.1326-1329.2004. PubMed: 15004110.
- Shabayek S, Abdalla S, Abouzeid AM (2013) Serotype and surface protein gene distribution of colonizing group B streptococcus in women in Egypt. *Epidemiol Infect* 8: 1-3. PubMed: 23561305.
- Persson E, Berg S, Bevanger L, Bergh K, Valsö-Lyng R et al. (2008) Characterisation of invasive group B streptococci based on investigation of surface proteins and genes encoding surface proteins. *Clin Microbiol Infect* 14: 66-73. doi:10.1111/j.1469-0691.2007.01877.x. PubMed: 18034863.
- Margarit I, Rinaudo CD, Galeotti CL, Maione D, Ghezzi C et al. (2009) Preventing bacterial infections with pilus-based vaccines: the group B streptococcus paradigm. *J Infect Dis* 199: 108-115. doi: 10.1086/595564. PubMed: 19086816.
- Sørensen UB, Poulsen K, Ghezzi C, Margarit I, Kilian M (2010) Emergence and global dissemination of host-specific *Streptococcus agalactiae* clones. *mBio* 1: e00178-10
- Oliveira IC, De Mattos MC, Pinto TA, Ferreira-Carvalho BT, Benchetrit LC et al. (2006) Genetic relatedness between group B streptococci originating from bovine mastitis and a human group B *Streptococcus* type V cluster displaying an identical pulsed-field gel electrophoresis pattern. *Clin Microbiol Infect* 12: 887-893. doi:10.1111/j.1469-0691.2006.01508.x. PubMed: 16882294.
- Zadoks RN, Middleton JR, McDougall S, Katholm J, Schukken YH (2011) Molecular epidemiology of mastitis pathogens of dairy cattle and

- comparative relevance to humans. *J Mammary Gland Biol Neoplasia* 16: 357-372. doi:10.1007/s10911-011-9236-y. PubMed: 21968538.
24. Cieslewicz MJ, Chaffin D, Glusman G, Kasper D, Madan A et al. (2005) Structural and genetic diversity of group B *Streptococcus* capsular polysaccharides. *Infect Immun* 73: 3096-3103. doi:10.1128/IAI.73.5.3096-3103.2005. PubMed: 15845517.
  25. Baseggio N, Mansell PD, Browning JW, Browning GF (1997) Strain differentiation of isolates of streptococci from bovine mastitis by pulsed-field gel electrophoresis. *Mol Cell Probes* 11: 349-354. doi:10.1006/mcpr.1997.0126. PubMed: 9375294.
  26. Dogan B, Schukken YH, Santisteban C, Boor KJ (2005) Distribution of serotypes and antimicrobial resistance genes among *Streptococcus agalactiae* isolates from bovine and human hosts. *J Clin Microbiol* 43: 5899-5906. doi:10.1128/JCM.43.12.5899-5906.2005. PubMed: 16333073.
  27. Lämmle C, Hahn GS (1994) Streptokokken-Infektionen und Rotlauf. In: H BlobelT Schliesser. *Handbuch der bakteriellen Infektionen bei Tieren*. Jena: Gustav Fischer Verlag. pp. 27-79.
  28. Martinez G, Harel J, Gottschalk M (2001) Specific detection by PCR of *Streptococcus agalactiae* in milk. *Can J Vet Res* 65: 68-72. PubMed: 11227199.
  29. Imperi M, Pataracchia M, Alfarone G, Baldassarri L, Orefici G et al. (2010) A multiplex PCR assay for the direct identification of the capsular type (Ia to IX) of *Streptococcus agalactiae*. *J Microbiol Methods* 80: 212-214. doi:10.1016/j.mimet.2009.11.010. PubMed: 19958797.
  30. Feil EJ, Li BC, Aanensen DM, Hanage WP, Spratt BG (2004) eBURST: inferring patterns of evolutionary descent among clusters of related bacterial genotypes from multilocus sequence typing data. *J Bacteriol* 186: 1518-1530. doi:10.1128/JB.186.5.1518-1530.2004. PubMed: 14973027.
  31. Elliott JA, Farmer KD, Facklam RR (1998) Sudden increase in isolation of group B streptococci, serotype V, is not due to emergence of a new pulsed-field gel electrophoresis type. *J Clin Microbiol* 36: 2115-2116. PubMed: 9650978.
  32. Chen M, Li LP, Wang R, Liang WW, Huang Y et al. (2012) PCR detection and PFGE genotype analyses of streptococcal clinical isolates from tilapia in China. *Vet Microbiol* 159: 526-530. doi:10.1016/j.vetmic.2012.04.035. PubMed: 22677479.
  33. Hunter SB, Vauterin P, Lambert-Fair MA, Van Duynne MS, Kubota K et al. (2005) Establishment of a universal size standard strain for use with the PulseNet standardized pulsed-field gel electrophoresis protocols: converting the national databases to the new size standard. *J Clin Microbiol* 43: 1045-1050. doi:10.1128/JCM.43.3.1045-1050.2005. PubMed: 15750058.
